# Supplementary material for: The Impact of Non-Invasive Ventilation on Sleep Quality in COPD Patients
Source: MDPI journal article supplement (doi:10.3390/jcm11185483), 2022-09-19
Supplement: s1 [file s1]

## Online Data Sublement

**Table S1.** Indication criteria for non-invasive vetiltaion [11]. In addition to the presence of clinical symptoms of chronic respiratory insufficiency, there must be at least one fulfilled criteria.

|                                                                                                                                                 |
|-------------------------------------------------------------------------------------------------------------------------------------------------|
| Diurnal hypercapnia with a $\text{PaCO}_2 > 50$ mm Hg.                                                                                          |
| Nocturnal hypercapnia with a $\text{PaCO}_2 > 55$ mm Hg.                                                                                        |
| Diurnal hypercapnia with a $\text{PaCO}_2$ 46–50 mm Hg and an increase in $\text{PtcCO}_2 > 10$ mmHg during sleep.                              |
| Persistent hypercapnia ( $\text{PaCO}_2 > 53$ mm Hg) at least 14 days after finishing acute ventilation therapy for acute respiratory acidosis. |
| When decannulation after prolonged weaning is only possible with the help of NIV, even after discharge from hospital.                           |

**Table S2.** Changes in spirometry, body plethysmography and respiratory muscle function following 3 months of High-intensity non-invasive ventilation (two-tailed t-test for dependent samples)

|                                        | Mean difference*<br>[confidence interval<br>lower/upper limit] | P-value      | N  |
|----------------------------------------|----------------------------------------------------------------|--------------|----|
| <b>Spirometry parameters</b>           |                                                                |              |    |
| VC [l]                                 | 0.2 [0.0/0.4]                                                  | <b>0.026</b> | 25 |
| VC [%predicted]                        | 5.5 [0.3/10.7]                                                 | <b>0.04</b>  | 25 |
| FVC [l]                                | 0.1 [-0.0/0.3]                                                 | 0.120        | 23 |
| FVC [%predicted]                       | 5.5 [0.7/10.7]                                                 | <b>0.026</b> | 23 |
| FEV <sub>1</sub> [l]                   | 0.1 [0.0/0.1]                                                  | <b>0.038</b> | 25 |
| FEV <sub>1</sub> [%predicted]          | 7.8 [-0.6/16.2]                                                | 0.068        | 25 |
| FEV <sub>1</sub> /FVC [%]              | 0.0 [-4.0/4.1]                                                 | 0.984        | 23 |
| <b>Body plethysmography parameters</b> |                                                                |              |    |
| <u>Resistance</u>                      |                                                                |              |    |
| Reff [kPa]                             | -5.5 [-16.6/5.7]                                               | 0.322        | 25 |
| Reff [%predicted]                      | -10.9 [-66.8/45.0]                                             | 0.691        | 25 |
| <u>Lung volume</u>                     |                                                                |              |    |
| RV [l]                                 | -0.2 [-0.6/-0.3]                                               | 0.498        | 25 |
| RV [%predicted]                        | -8.4 [-30.4/13.4]                                              | 0.432        | 25 |
| TLC [l]                                | 0.0 [-0.5/0.5]                                                 | 0.982        | 24 |
| TLC [%predicted]                       | -0.5 [-8.6/7.7]                                                | 0.909        | 24 |
| <b>Respiratory muscle function</b>     |                                                                |              |    |
| P0.1 [kPa]                             | 0.0 [-0.0/0.1]                                                 | 0.603        | 20 |

|                                |                   |       |    |
|--------------------------------|-------------------|-------|----|
| P0.1 [%predicted]              | 10.3 [-34.2/54.7] | 0.635 | 20 |
| PI <sub>max</sub> [kPa]        | 0.2 [-0.5/0.9]    | 0.497 | 20 |
| PI <sub>max</sub> [%predicted] | 4.5 [-4.6/13.5]   | 0.319 | 20 |

**Abbreviations:** Forced expiratory volume in 1 second= FEV<sub>1</sub>; Forced vital capacity= FVC; Residual volume= RV; Total lung capacity= TLC; Body mass index= BMI; Partial pressure of arterialized oxygen= PaO<sub>2</sub>; Partial pressure of arterialized carbon dioxide= PaCO<sub>2</sub>; arterialized standard hydrogen carbonate= HCO<sub>3</sub><sup>-</sup>; Pressure during 0.1 sec. inspiratory occlusions= P 0.1; Maximal inspiratory pressure= PI max.

**Table S3.** Changes in blood gas analysis following 3 months of High-intensity non-invasive ventilation (two-tailed t-test for dependent variables)

|                                 | Mean difference*<br>[confidence interval<br>lower/upper limit] | P-value*     | N  |
|---------------------------------|----------------------------------------------------------------|--------------|----|
| <b>Blood gas analysis</b>       |                                                                |              |    |
| pH                              | 0.0 [-0.1/0.1]                                                 | 0.314        | 14 |
| PO <sub>2</sub>                 | 4.0 [-5.6/13.8]                                                | 0.192        | 14 |
| PCO <sub>2</sub>                | -4.2 [-10.1/1.7]                                               | 0.072        | 14 |
| Transcutaneous PCO <sub>2</sub> | -3.9 [-7.7/-0.12]                                              | <b>0.044</b> | 25 |

**Abbreviations:** Partial pressure of arterialized oxygen= PaO<sub>2</sub>; Partial pressure of arterialized carbon dioxide= PaCO<sub>2</sub>.

**Figure S1:** Boxplot illustrating the results of polysomnographic measurements prior NIV (t1) and following 3 months of noninvasive ventilation (t2) in COPD patients without comorbid obstructive sleep apnea syndrom (n=15).

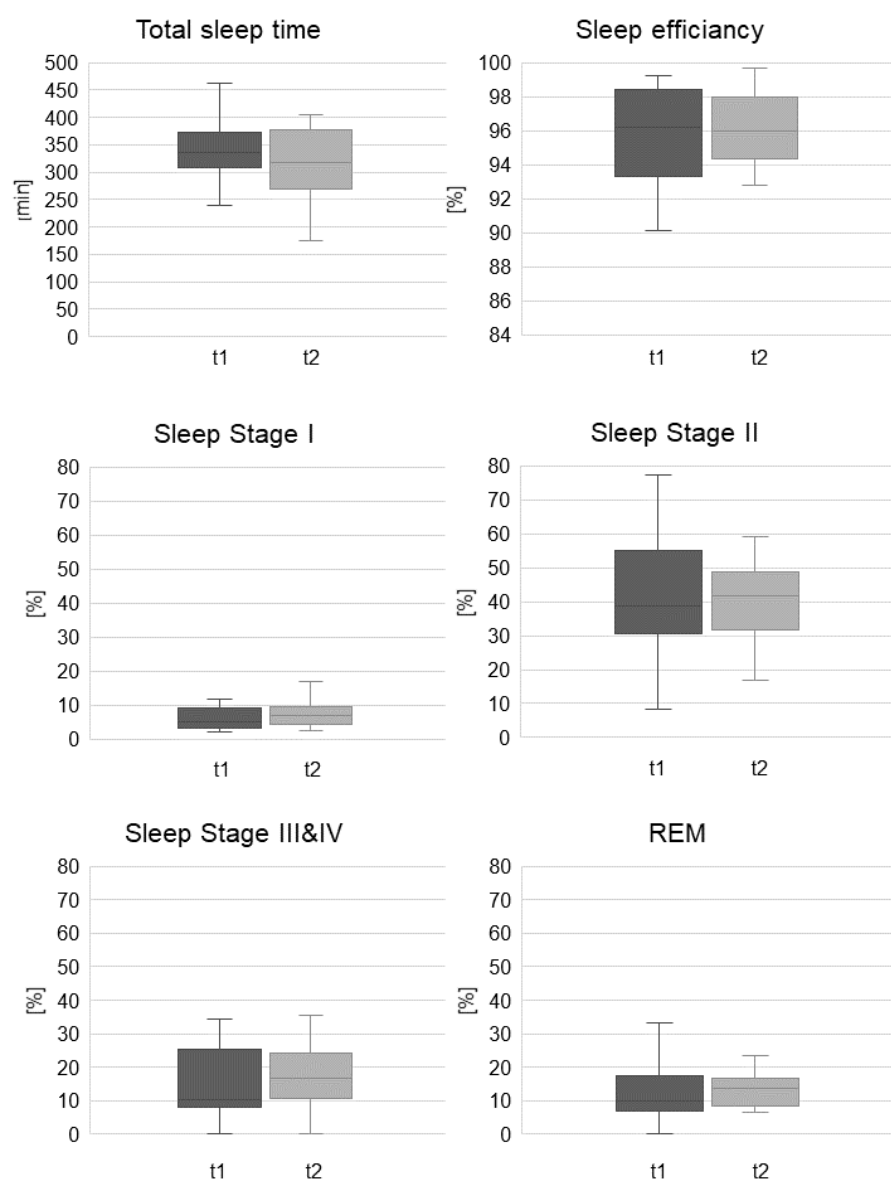

**Abbreviations:** Minutes= min; Rapid eye movement= REM.

**Figure S2:** Boxplot illustrating the results of polysomnographic measurements prior NIV (t1) and following 3 months of noninvasive ventilation (t2) in COPD patients with comorbid obstructive sleep apnea syndrom (n=10).

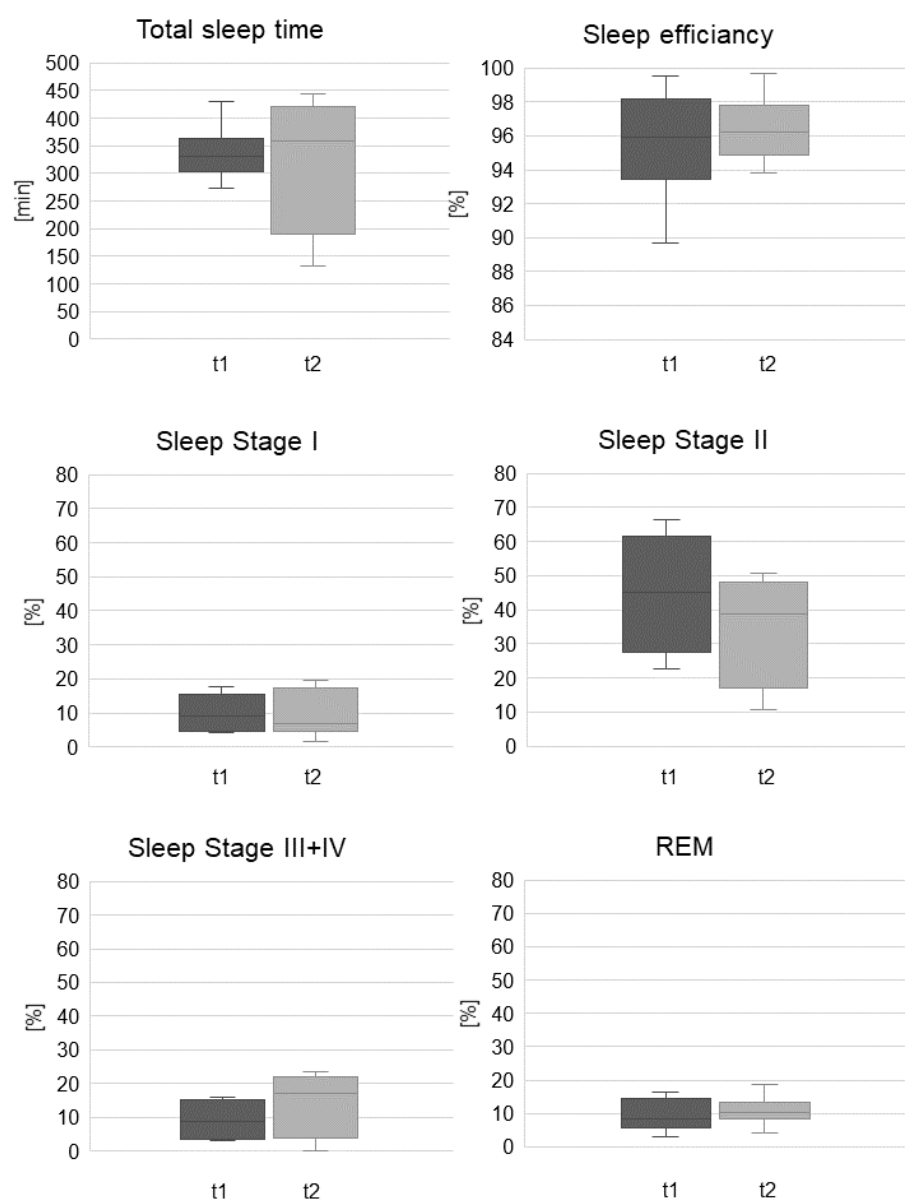

**Abbreviations:** Minutes= min; Rapid eye movement= REM.
